# Supplementary material for: A novel role of the soybean clock gene LUX ARRHYTHMO in male reproductive development
Source: PubMed Central journal article supplement (PMC5587693; doi:10.1038/s41598-017-10823-y), 2017-09-06
Supplement: 41598_2017_10823_MOESM1_ESM.pdf [file 41598_2017_10823_MOESM1_ESM.pdf]

GmLUXc : MGEEVKTSEYDEE-----RVMEWEAGLPTANDLTPLSQPLIPPE : 39  
GmLUXb : MGEEVKTSEYDEE-----RVMEWEMGLPTANDLTPLSQPLIPPE : 39  
GmLUXa : ----- : -  
PsLUX : MGEEIR---TDEE-----RVTEWEKGLPNLHDLTPLSMTLIPPE : 36  
MtLUXlike : MGEEVR---TDEE-----RVTEWEKGLPNLHDLTPLSMALIPPE : 36  
LjLUXlike : MGEEVRM--MDEE-----RLMEWEKGLPSVHDLTPLSQPLIPPE : 37  
AtLUX : MGEEVQMSDY----DVSQGDG--RVSEWEMGLPSDEDLASLSYSLIPEN : 43  
AtBOA : MGKEVMVSDYGDDGDGAGGGDEYRIPEWELGLPNGDDLTPLSQYLVSISI : 50

GmLUXc : LASAFSILPEPHRTLLDVNRASRNTLSLIRGGGGSVHQAFSSSNNN-HNY : 88  
GmLUXb : LASAFSISPEPHRTLLDVNRASRNTLSLIRGGG-SVHQAFSSNNNNHHY : 88  
GmLUXa : -----MSLEPHRIVLVNVRKSGCNTLSTIRSDR-TMQHAFFSSNNNNQH : 43  
PsLUX : LASAFSISPEPHRTLLDVNRASRNTLSLIRGGG-TNHQTFSSNNEE-IE : 84  
MtLUXlike : LASAFSISPEPHRTLLDVNRASRNTLSLIRSN--SGTITNQINQTM-SCE : 83  
LjLUXlike : LATAFSISPEPRRTLLDVNRASRNTLSLIRSGG-APLQALSSSDEEGEGG : 86  
AtLUX : LAMAFSITPERSRTIQDVNRASETTLSSLRGGSSGPNTSSSNNNVEEEDR : 93  
AtBOA : LALAFSMTIPERSRTIHDVNRASQITLSSLR-----SSTNASSVMEEVDR : 95

GmLUXc : DGDGDGGVEEEDDDDDRDGSG-PDSRKORKIDCGAAFEADS AVQTETSA : 137  
GmLUXb : DGDGDGG-DEEYDDADR DSGG-SDSRKORKIDCGVAEADS AVRTETSA : 136  
GmLUXa : NGDGDVN-DKEDNDDTCKDSR-SDSR-----TETSA : 73  
PsLUX : EED-----EMEETDRDGGG-SDSRKLRKIDSATEE----ADSAVRT- : 122  
MtLUXlike : IED-----IEDEEPRDGGG-SDSRKHRKIDSVIEEVEAEADS AVRT- : 125  
LjLUXlike : GGG-----GEEDTTDRDGGSGGSGSRKQKVDCAAE-----ADSAVRT : 126  
AtLUX : VGS-----SPGSDSKKQKTSNGDGGDGGVDPDSAMAAEEGDSGTEDL : 137  
AtBOA : VES-----SVPGSDPKKQKKS--DGGEAAVEDS---TAEEGDSGPEDA : 134

MYB domain

GmLUXc : ERTAVKRPRLVWTPQLHKRFVDVVAHLGIKNAVPKTIQMLMNVEGLTREN : 187  
GmLUXb : ERTAVKRPRLVWTPQLHKRFVDVVAHLGIKNAVPKTIQMLMNVEGLTREN : 186  
GmLUXa : KRTTVKRLQLVWTLQLHKRFVDVVAHLGIKNAVPKTIQMLMNVEGLSL-- : 121  
PsLUX : -ETTLKRPRLVWTPQLHKRFVDVVAHLGIKNAVPKTIQMLMNVEGLTREN : 171  
MtLUXlike : -TETIKRPRLVWTPQLHKRFVDVVAHLGIKNAVPKTIQMLMNVEGLTREN : 174  
LjLUXlike : DTATLKRPRLVWTPQLHKRFVDVVAHLGIKNAVPKTIQMLMNVEGLTREN : 176  
AtLUX : SGKTLKRPRLVWTPQLHKRFVDVVAHLGIKNAVPKTIQMLMNVEGLTREN : 187  
AtBOA : SGKTKRPRLVWTPQLHKRFVDVVAHLGIKNAVPKTIQMLMNVEGLTREN : 184

MYB domain

GmLUXc : VASHLQKYRLYLKRMQGLSNEGPF--SASDQLFASTPVP--QSLHDSAPPSN : 234  
GmLUXb : VASHLQKYRLYLKRMQGLSNEGPF--SSSDQLFASTAVP--QSLHDSAPPSA : 233  
GmLUXa : ----- : -  
PsLUX : VASHLQKYRLYLKRMQGLSNDAP--SSSDHLFASTPVP--QSLHESASAVN : 218  
MtLUXlike : VASHLQKYRLYLKRMQGLSNDAP--SSSDHLFASTPVP--QSLHETASAN- : 220  
LjLUXlike : VASHLQKYRLYLKRMQGLSNEGPF--SSSDHLFASTPVP--QSLHDSAAA AV : 223  
AtLUX : VASHLQKYRLYLKRMQGLTNEGPF--SASDKLFSSTPVPVPOSFQDI----- : 230  
AtBOA : VASHLQKYRLYLKRIQGLTTEEDPYSSSDQLFSSTPVPVPOSFQD----- : 228

GmLUXc : HSNHGHHGHSNGRHHGHHGHHLS-----VPMMSMFYPPPLMSMPY : 278  
GmLUXb : HSN-----GHGHP-----VPMMSMFYPPPMMSMPY : 259  
GmLUXa : ----- : -  
PsLUX : S-----HSQSNHGNSHSHHS-----VTIPMFYPPPPPPMMS : 250  
MtLUXlike : -----HSNSHSHSHSHSHHS-----VTIPMFYPPPPSSMMS : 251  
LjLUXlike : AAT-----AHSNSHSQTHSHSHGHGNFFHLPVPIPMFYPPP---MMS : 262  
AtLUX : -----GGGGSSGNVG-----VPIFGAYGTQQQMQ : 255  
AtBOA : -----GGGSNGKLG-----VPEV---VPSMVP : 247

GmLUXc : PP--PMSGMP--HGIMGIPMPNSSA-----TSAYHPYNMLHQRD : 314  
GmLUXb : PP--PMSGMPHAHGIMGIPMPNSSA-----TSAYHPYNMLHQRD : 297  
GmLUXa : ----- : -  
PsLUX : MP-LLGMP--PHPHGHMGMALHPPSG-----SSSYRSHPFNMMHHRD : 289  
MtLUXlike : MPPMIGMG--HHPHGHMGMMLPPPSGG-----SSSYRSHPFNMMHHRD : 292  
LjLUXlike : MP-FHGMPHLHHGHGMGMQ----- : 281  
AtLUX : MPVYAHMGMQGYHHQNHNDPYHQNHRRHHGAGGNGAFESNPYMMQQNK : 305  
AtBOA : IPGYGNQMGMQGYQQYSNH-----GN---ESNQYMMQQNK : 280

GmLUXc : WP-----HLAPNDK-- : 323  
GmLUXb : WP-----HLAPNDK-- : 306  
GmLUXa : ----- : -  
PsLUX : WPPHPHSHSHPHMSPNDSNK : 309  
MtLUXlike : WPPNPHSHSHPHMSSNDSNK : 312  
LjLUXlike : -----KTKTKTK : 288  
AtLUX : FGSMASYPSVGGGSANEN-- : 323  
AtBOA : FGTMVTYPSVGGGDVNDK-- : 298

**Supplementary Figure 1**  
Amino acids alignment for LUX-Like protein

**A**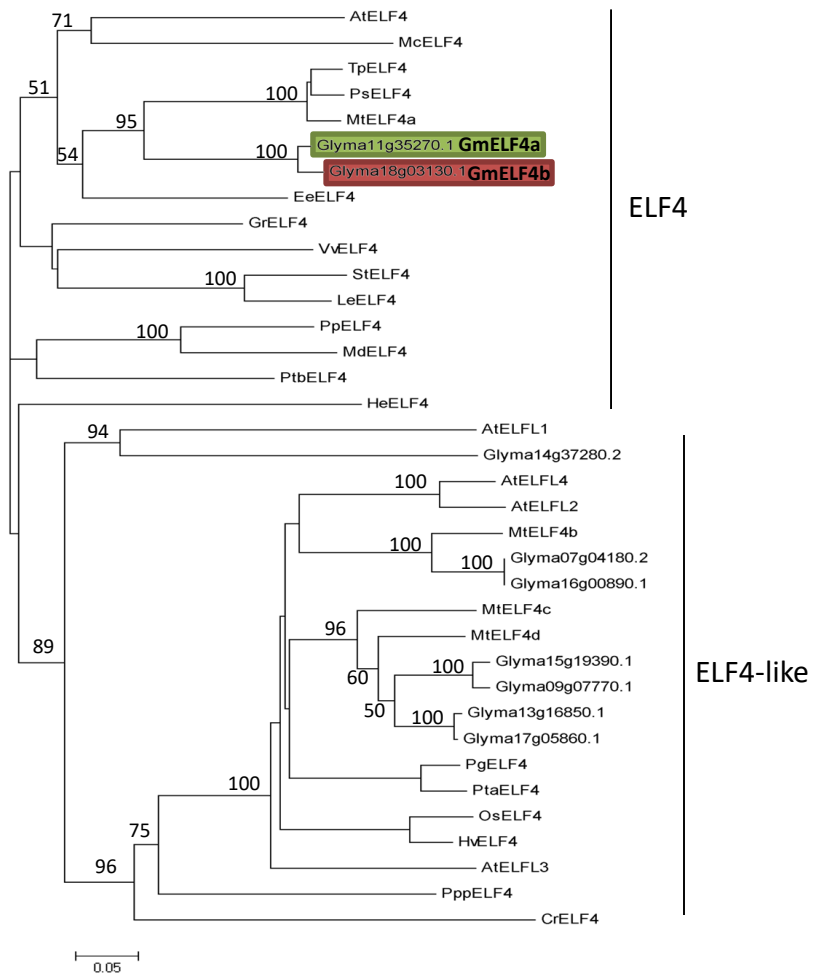**B**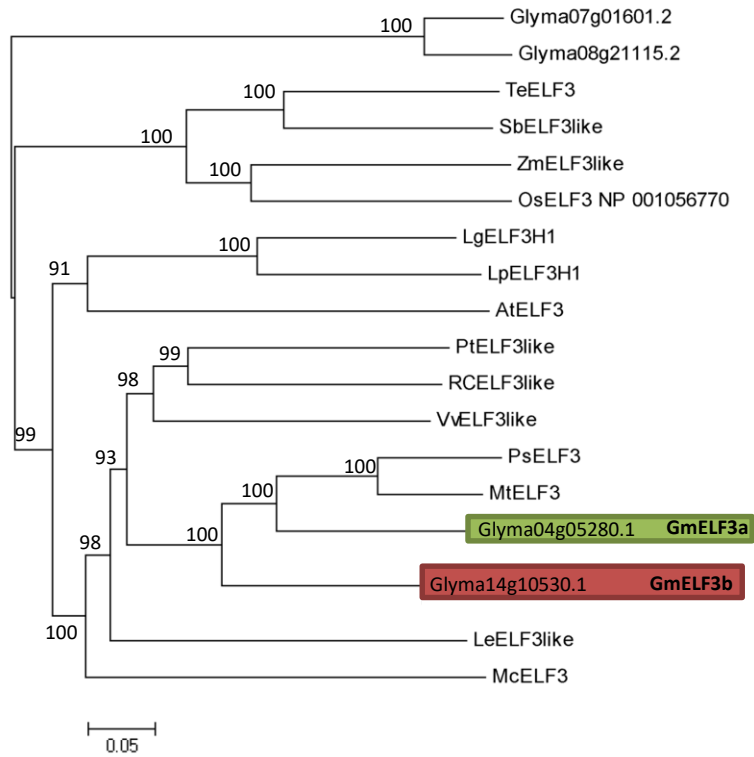

**Supplementary Figure 2.** Phylogenetic analyses of ELF4-like and ELF3-like proteins.

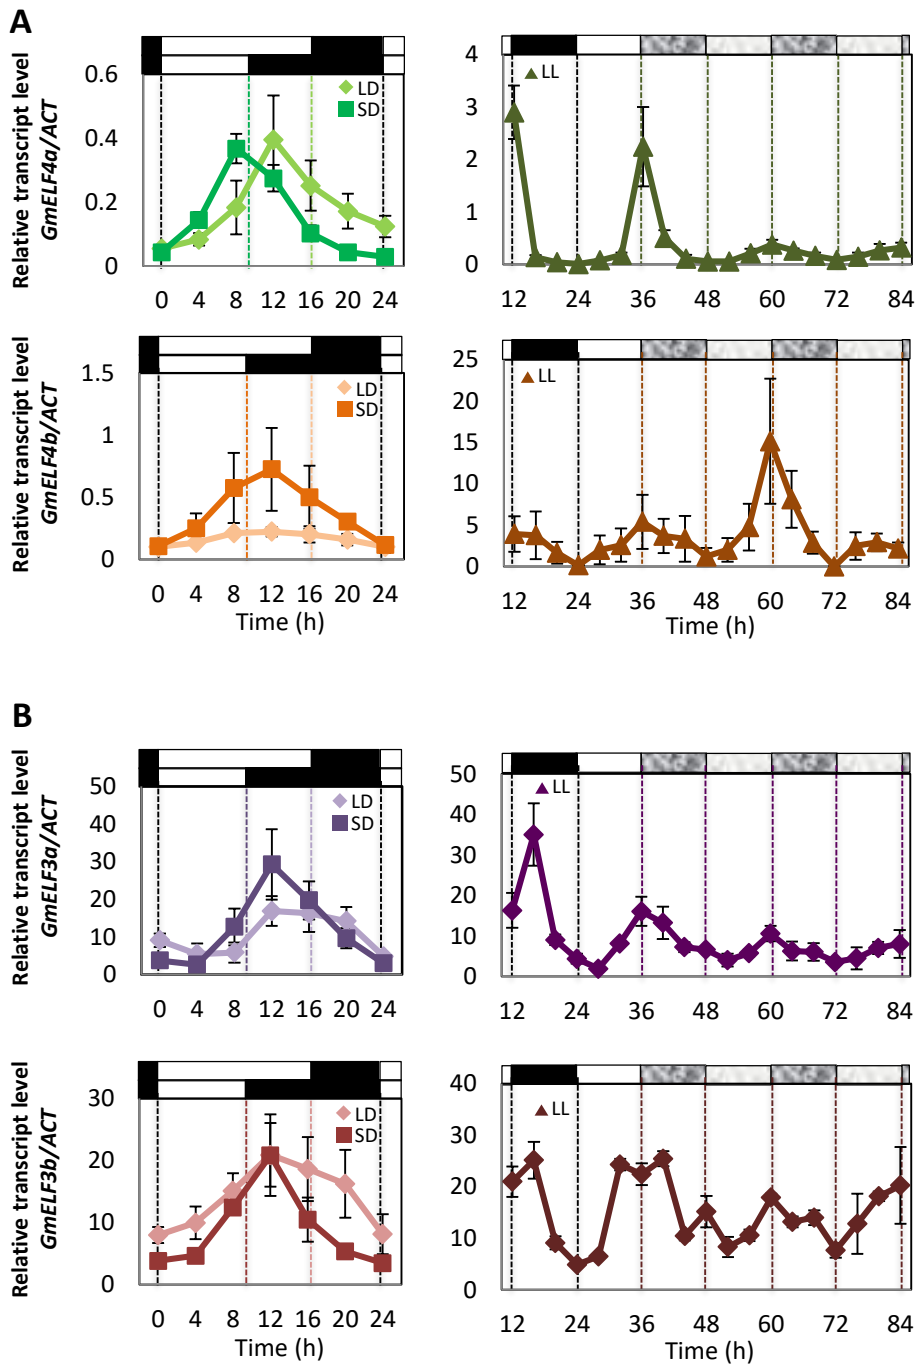

**Supplementary Figure 3. Homologues of soybean *ELF4* and *ELF3* transcripts show diurnal and circadian rhythms.**

**(A)** *GmELF4a* and *GmELF4b* expression level under long-day long-day (LD; 16h light, 8h dark) or short-day (SD; 10h light, 14h dark), or constant light (LL; 12h light:12h dark then continuous light). **(B)** *GmELF3a* and *GmELF3b* expression level under LD (16L: 8D), SD (10L:14D), or LL (12L: 12D then continuous light). All plants were three weeks old at the time of sampling. Data are mean  $\pm$  SE for n = three biological replicates, each consisting of pooled material from two plants. Day and night periods are indicated by open and closed bars, respectively, above the graph.

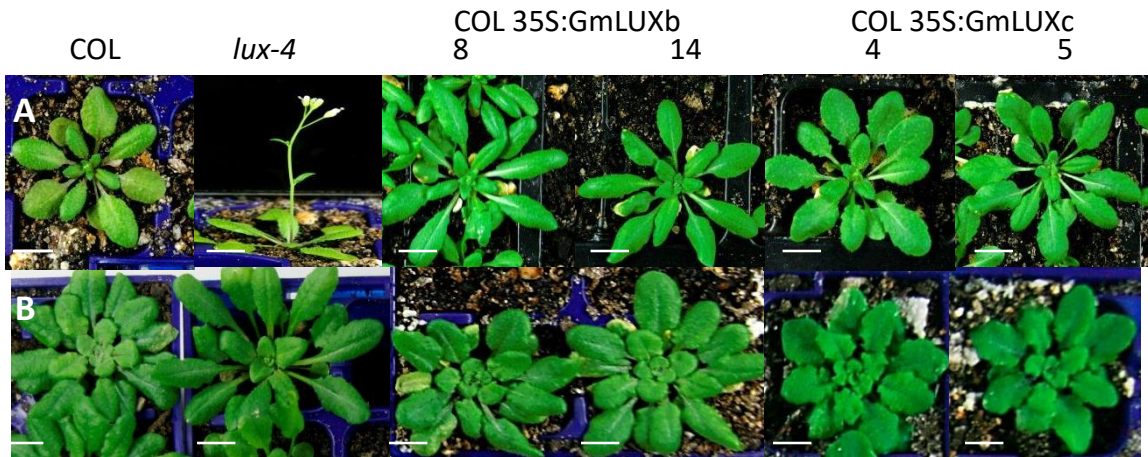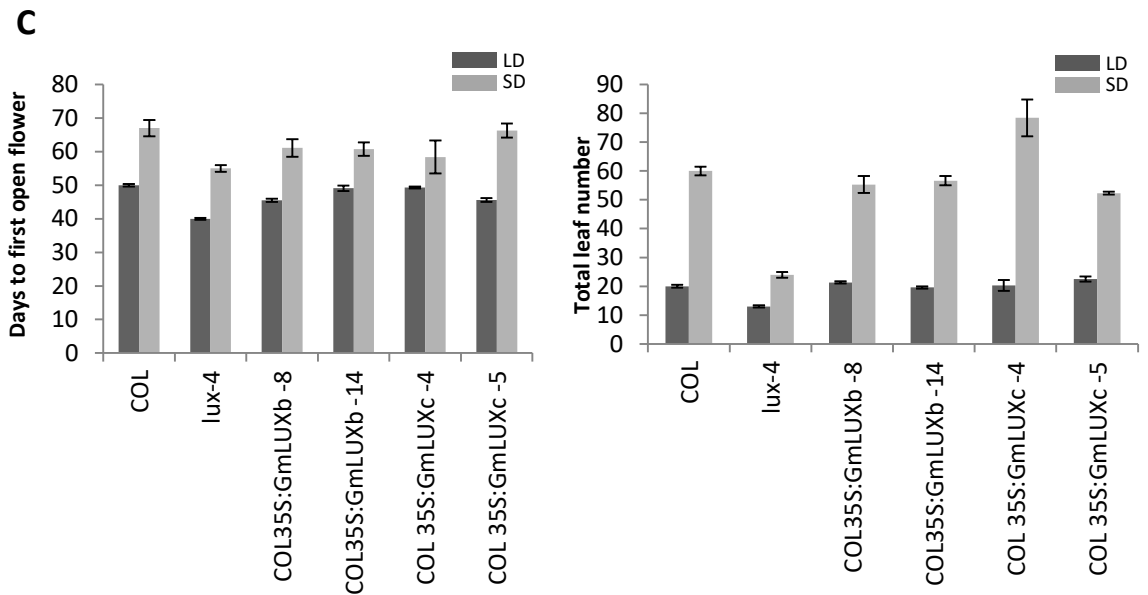

**Supplementary Figure 4. Ectopic expression of *GmLUXb* and *GmLUXc* in *Arabidopsis Columbia (Col)* show similar phenotype as in *lux-4* mutant.**

**(A)** Representative plants are grown in LD (16L: 8D). **(B)** Representative plants are grown in SD (10L:14D). **(C)** Flowering time of plants grown in LD and SD, data are mean  $\pm$  SE for n = 15-20.

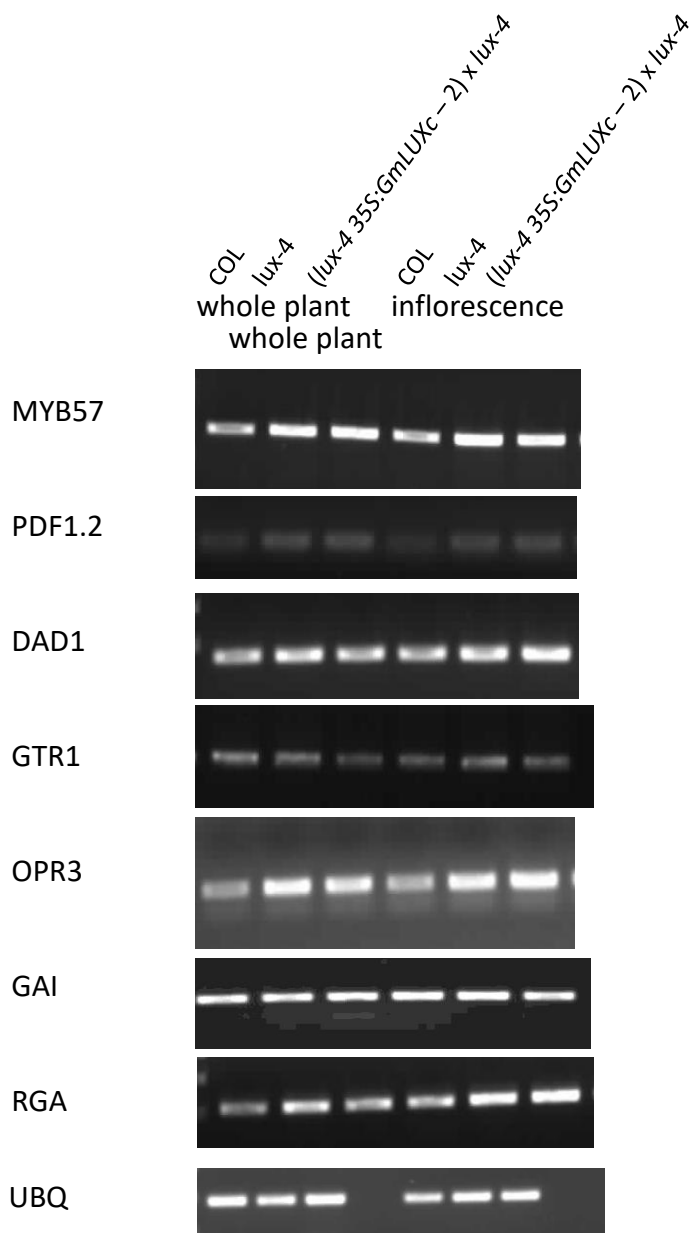

**Supplementary Figure 5.** Expression of *MYB57*, *GTR1*, *PDF1*, *DAD1*, *OPR3*, *RGA*, *GAI* genes in *35S::GmLUXc* transgenic plants.

**Supplementary Table 1.** *Cis*-element analysis of 5' regions of *GmLUXb* and *GmLUXc* in comparison to *AtLUX*.

| Response           | Site Name                      | Sequence         | AtLUX | GmLUXb | GmLUXc |
|--------------------|--------------------------------|------------------|-------|--------|--------|
| <b>Circadian</b>   | Clock                          | CAANNNNATC       | 3     | 2      | 4      |
|                    | CCA1                           | AAMAATCT         | 0     | 0      | 1      |
|                    | Evening element                | AAAATATCT        | 1     | 1      | 1      |
|                    | LBS (LUX binding sites)        | GATWCG           | 2     | 0      | 1      |
| <b>Gibberellin</b> | TAACA(A/G)A element            | TAACA(A/G)A      | 1     | 1      | 1      |
|                    | TATCCA(C/T) element            | TATCCA(C/T)      | 1     | 1      | 0      |
|                    | pyrimidine box                 | (C/T)CTTTT(C/T)  | 7     | 4      | 10     |
| <b>Ethylene</b>    | GCC element                    | GCCGCC           | 1     | 0      | 0      |
|                    | A(A/T)TTCAAA element           | A(A/T)TTCAAA     | 1     | 0      | 1      |
| <b>Cytokinin</b>   | cytokinin response motif (CRM) | (A/G)GAT(T/C)    | 30    | 16     | 17     |
| <b>Auxin</b>       | ABRE                           | (C/T)ACGTG       | 3     | 3      | 1      |
|                    | TGTCTC element                 | TGTCTC           | 1     | 1      | 1      |
| <b>Light</b>       | I-box                          | GATAAGR          | 1     | 0      | 1      |
|                    | G-box                          | CACGTG           | 2     | 2      | 0      |
|                    | H-box                          | ACCTA(A/C)C(A/C) | 1     | 0      | 0      |
|                    | Sp1                            | CC(G/A)CCC       | 0     | 1      | 1      |
| <b>Sugars</b>      | TATCCA element                 | TATCCA           | 1     | 2      | 0      |
|                    | SURE                           | (AA)TACTA(A/T)T  | 1     | 0      | 2      |
|                    | W-box                          | (T)TGAC(C/T)     | 0     | 1      | 1      |
| <b>Cold</b>        | C-repeat                       | CCGAC            | 3     | 1      | 0      |
|                    | LTR                            | CCGAAA           | 0     | 2      | 1      |

**Supplementary Table 2.** Primers sequences used in gene isolation, Real-Time PCR, and construct cloning.

| Primer name        | Sequence (5'-3')             | Uses                                            |
|--------------------|------------------------------|-------------------------------------------------|
| ACT-F              | ATCATGTTTGAGACCTTCAATGTG     | RT-PCR                                          |
| ACT-R              | CTCGAGTTCTTGCTCATAATCTAGG    |                                                 |
| LUXb-3F            | AATGGCCATGGTCATCTCCC         | RT-PCR                                          |
| LUXb-3R            | GCACCTTCTATAACATTGTA         |                                                 |
| LUXc-4F            | AATGGTCATGGTCATGGGCA         | RT-PCR                                          |
| LUXc-1R            | ATGATGGTGATGGCTGACCT         |                                                 |
| BamHI-GFP-F        | GGATCCATGGTGAGCAAGGGCGAGGAG  | pUC18/2x35S::GFP::GmLUXb,<br>2x35S::GFP::GmLUXc |
| GFP-NS-XbaI-R      | GCTCTAGACTTGTACAGCTCGTCCATG  |                                                 |
| LUX-XbaI-F         | GCTCTAGAATGGGGGAAGAGC        | pUC18/2x35S::GFP::GmLUXb,<br>2x35S::GFP::GmLUXc |
| LUX-KpnI-R         | CCGGGTACCTCATTATCATTAG       |                                                 |
| LUX-EcoRI-F        | CCGGGAATTCATGGGGGAAG         | vector pMLBART/35S::GmLUXb or<br>35S::GmLUXc    |
| LUX-BamHI-R        | CGCGGGATCCTCATTATCA          |                                                 |
| CaMV35S-NotI-F     | ATTTGCGGCCGCATGGTGGAGCACGAC  | pMLBART/35S::GmLUXb or<br>35S::GmLUXc           |
| polyA-NotI-R       | AGGAGCGGCCGCACTGGATTTTGGTTT  |                                                 |
| T7 promoter 2      | TAATACGACTCACTATAGGGCGA      | Yeast-two hybrid cloning                        |
| 3' BD sequencing 2 | AGCAACCTGACCTACAGGAA         |                                                 |
| 3' AD sequencing   | AGATGGTGCACGATGCACAG         |                                                 |
| Gal4_N_term_primer | GAGTAGTAACAAAGGTCAA          | Yeast-three hybrid cloning                      |
| pHybLex_rev_primer | GAGTCACTTTAAAATTTGTATACAC    |                                                 |
| AtUBQ10-F          | GGCCTTGATAATCCCTGATGAATAAG   | RT-PCR                                          |
| AtUBQ10-R          | AAAGAGATAACAGGAACGGAAACATAGT |                                                 |
| AtGTR1-F           | GTCCATTGGCTGGTATTGCT         | RT-PCR                                          |
| AtGTR1-R           | ACTTGCTGCAACGTGCATAG         |                                                 |
| AtPDF1.2-F         | TTTGCTGCTTTCGACGCAC          | RT-PCR                                          |
| AtPDF1.2-R         | CGCAAACCCCTGACCATG           |                                                 |
| AtDAD1-F           | GTGAAGACGAAGAAGAAGAGCAATC    | RT-PCR                                          |
| AtDAD1-R           | GTGAAGACAGCGAAAACGACATAC     |                                                 |
| AtOPR3-F           | TTGACGCAACTGATTCTGAC         | RT-PCR                                          |
| AtOPR3-R           | GTAGGCGTGGTAGCGAGGTT         |                                                 |
| AtMYB21-F          | AAAATCGCCAAACATCTTCC         | RT-PCR                                          |
| AtMYB21-R          | AATTATAACCCCAAACCTCTACAA     |                                                 |
| AtMYB24-F          | ATGCAAAATGGGGAAATAGGTG       | RT-PCR                                          |
| AtMYB24-R          | AAGATCATCGACGCTCCAATAGTT     |                                                 |
| AtMYB57-F          | GTGCGGCGAGGGAACATAA          | RT-PCR                                          |
| AtMYB57-R          | TCAGCAATAGAAAAACCAAATAAC     |                                                 |
| AtGA2ox1-F         | CGGTTCGGGTCCACTATTTTC        | RT-PCR                                          |
| AtGA2ox1-R         | ACCTCCCATTTGTCATCACCTG       |                                                 |
| AtGA20ox2-F        | CCGGCAGAGAAAGAACACGAA        | RT-PCR                                          |
| AtGA20ox2-R        | TACGCCTAAACTTAAGCCCAGAA      |                                                 |
| AtRGA-F            | AGAAGCAATCCAGCAGA            | RT-PCR                                          |
| AtRGA-R            | GTGTACTCTCTTCTTACCTTC        |                                                 |
| AtGAI-F            | CACACGACCGCTCATAG            | RT-PCR                                          |
| AtGAI-R            | TGCCTATCCAATTTACCTC          |                                                 |
